# Supplementary material for: Abuse and disrespect in childbirth process and abortion situation in Latin America and the Caribbean—systematic review protocol
Source: PubMed Central journal article supplement (PMC5541749; doi:10.1186/s13643-017-0516-5), 2017-08-03
Supplement: 13643_2017_516_MOESM1_ESM.pdf [file 13643_2017_516_MOESM1_ESM.pdf]

**Additional file 1: Table 1**

**Table 1: Types of abuse and disrespect of women in the process of delivery and/or abortion<sup>1</sup>**

| <b>Third order Terms</b>                       | <b>Second order Terms</b>                                                                                       | <b>First Order Terms</b>                                                                                                                                                                                                                                                                                                                                                                                                                                         |
|------------------------------------------------|-----------------------------------------------------------------------------------------------------------------|------------------------------------------------------------------------------------------------------------------------------------------------------------------------------------------------------------------------------------------------------------------------------------------------------------------------------------------------------------------------------------------------------------------------------------------------------------------|
| Physical abuse                                 | Use of force<br>Physical restraint                                                                              | Women beaten, slapped, kicked or pinched during delivery<br>Women physically restrained to the bed or gagged during delivery                                                                                                                                                                                                                                                                                                                                     |
| Sexual abuse                                   | Sexual Abuse                                                                                                    | Sexual abuse or rape                                                                                                                                                                                                                                                                                                                                                                                                                                             |
| Verbal abuse                                   | Harsh language<br>Threats and blaming                                                                           | Harsh or rude language<br>Judgmental or accusatory comments<br>Threats of withholding treatment or poor outcomes<br>Blaming for poor outcomes                                                                                                                                                                                                                                                                                                                    |
| Stigma and discrimination                      | Discrimination based on sociodemographic characteristics<br>Discrimination based on medical conditions          | Discrimination based on ethnicity/race/religion<br>Discrimination based on age<br>Discrimination based on socioeconomic status<br>Discrimination based on HIV status                                                                                                                                                                                                                                                                                             |
| Failure to meet professional standards of care | Lack of informed consent and confidentiality<br>Physical examinations and procedures<br>Neglect and abandonment | Lack of informed consent process<br>Breaches of confidentiality<br>Painful vaginal exams<br>Refusal to provide pain relief<br>Performance of unconsented surgical operations<br>Neglect, abandonment or long delays<br>Skilled attendant absent at time of delivery                                                                                                                                                                                              |
| Poor rapport between women and providers       | Ineffective communication<br>Lack of supportive care<br>Loss of autonomy                                        | Poor communication<br>Dismissal of women's concerns<br>Language and interpretation issues<br>Poor staff attitudes<br>Lack of supportive care from health workers<br>Denial or lack of birth companions<br>Women treated as passive participants during childbirth<br>Denial of food, fluids or mobility<br>Lack of respect for women's preferred birth positions<br>Denial of safe traditional practices<br>Objectification of women<br>Detainment in facilities |

Source: Data adapted from Bohren et al (2015).

<sup>1</sup> The information in this table were taken from a similar table developed by Bohren et al (2015), from where we deliberately remove information about conditions and restrictions of the health system for not belonging to approach this review.
